# Supplementary material for: Investigating the role of microwave thermal and non-thermal effects on WO3-graphene oxide composite synthesis
Source: Royal Society of Chemistry journal article supplement (doi:10.1039/d3ra04113a), 2023-01-01
Supplement: d3ra04113a1.pdf [file d3ra04113a1.pdf]

## **SUPPORTING INFORMATION**

# **Investigating the Role of Microwave Thermal and Non-Thermal Effects on WO<sub>3</sub>-Graphene Oxide Nanocomposite Synthesis**

Bárbara S. Rodrigues,<sup>a</sup> Marcos R. S. Vicente,<sup>a</sup> Juliana S. Souza<sup>a\*</sup>

*<sup>a</sup>Centro de Ciências Naturais e Humanas, Universidade Federal do ABC, 09210-580 Santo André, SP, Brazil*

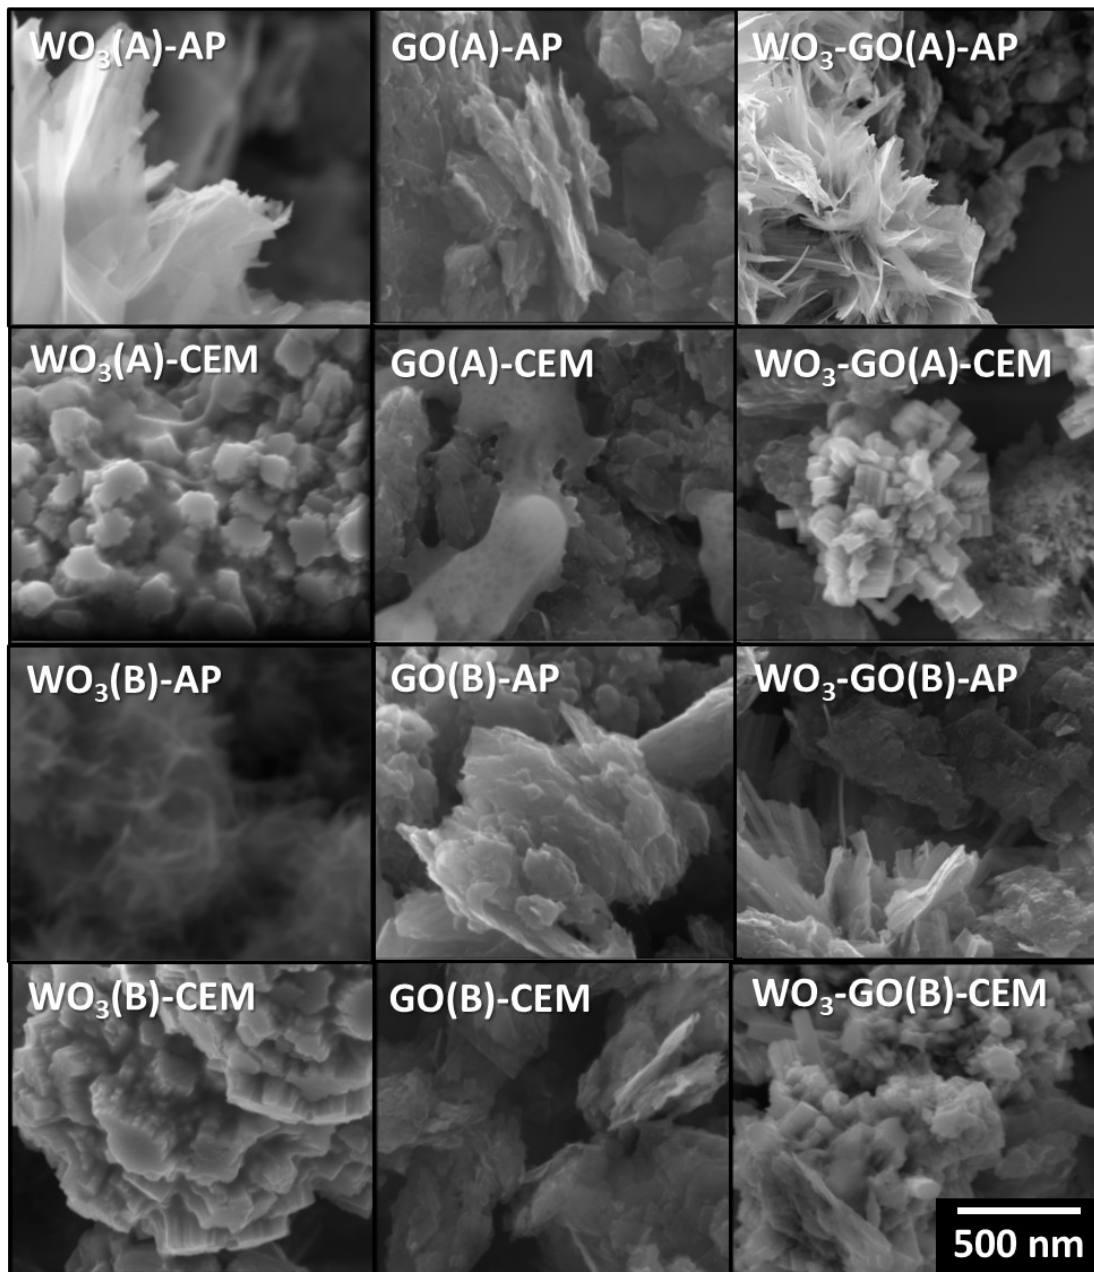

Figure S1. SEM images of the  $\text{WO}_3$ , GO and  $\text{WO}_3$ -GO samples.

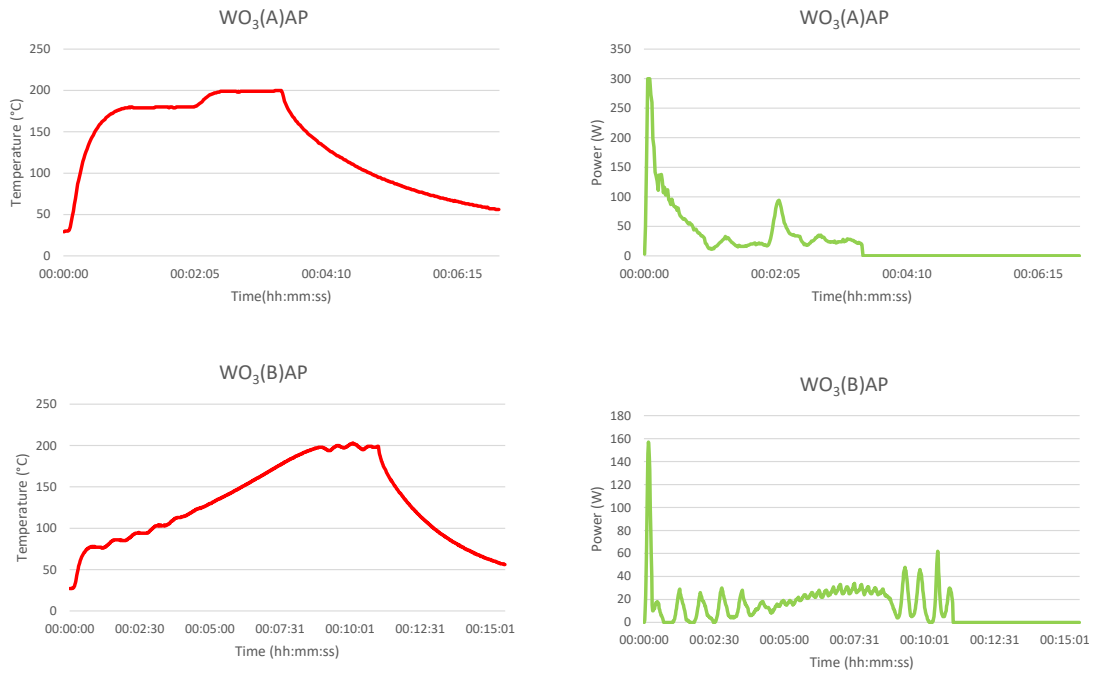

Figure S2. Graphs of temperature and irradiation power as a function of time for synthesizing WO<sub>3</sub>(A and B)-AP samples.

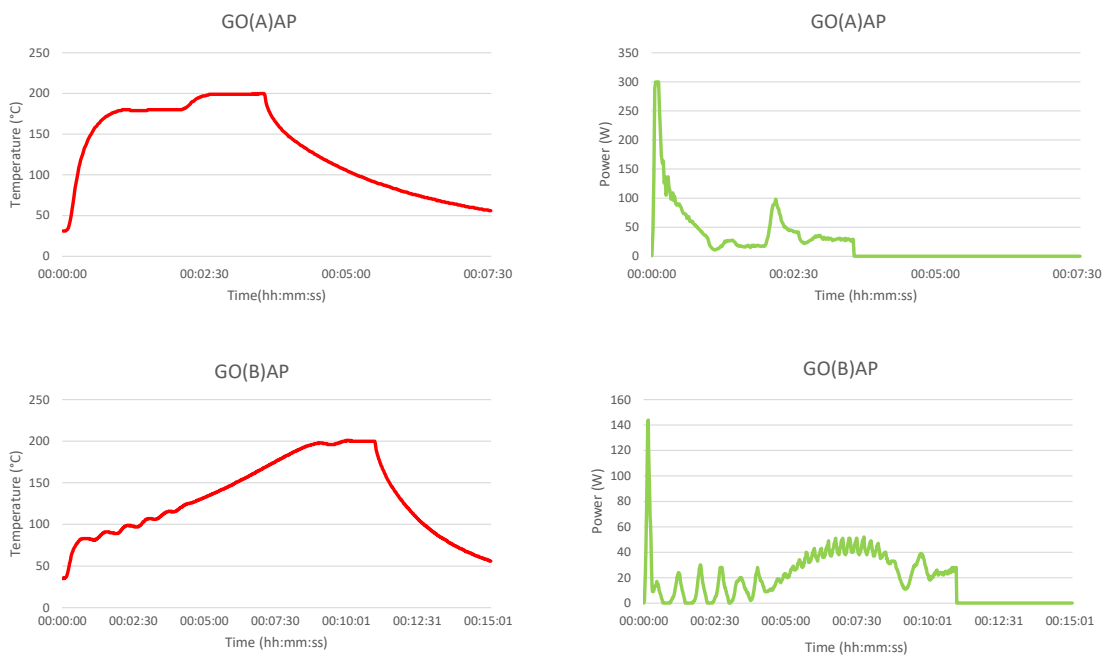

Figure S3. Graphs of temperature and irradiation power as a function of time for synthesizing GO(A and B)-AP samples.

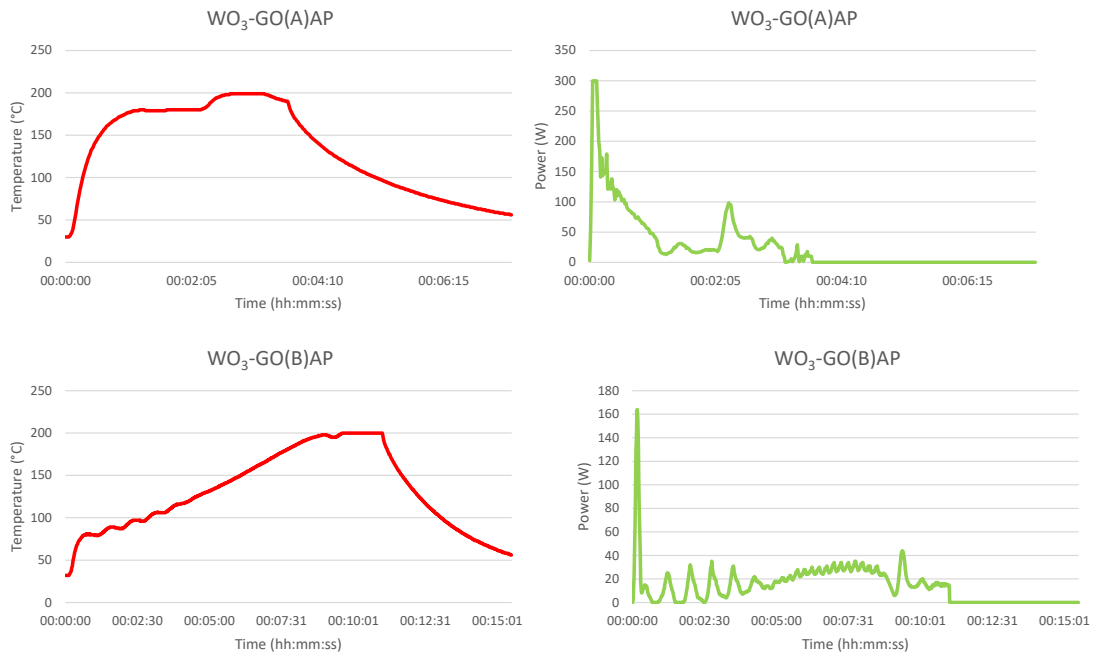

Figure S4. Graphs of temperature and irradiation power as a function of time for synthesizing  $WO_3$ -GO(A and B)-AP samples.

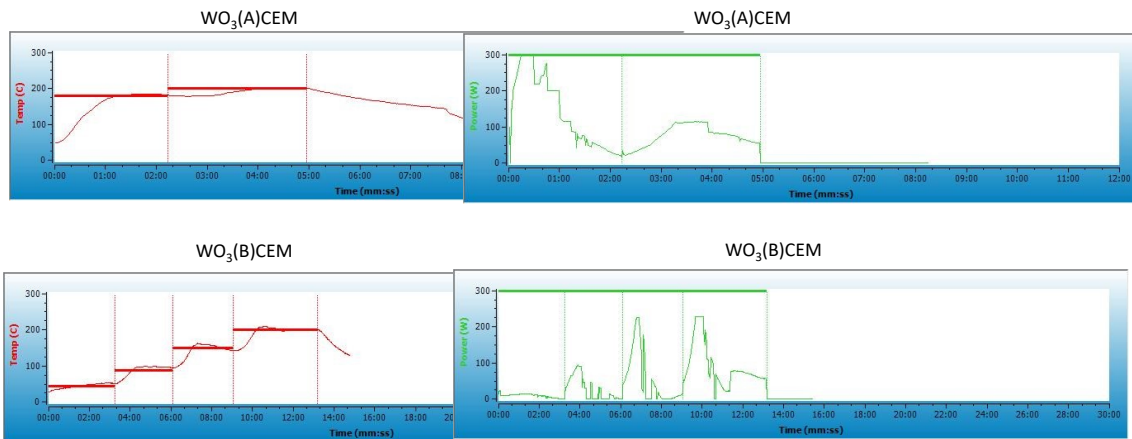

Figure S5. Graphs of temperature and irradiation power as a function of time for synthesizing  $WO_3$ (A and B)-CEM samples.

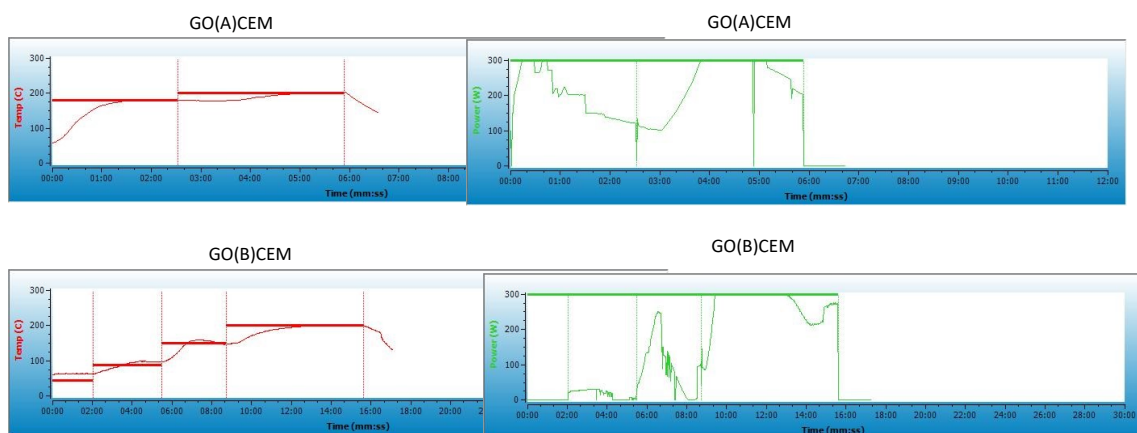

Figure S6. Graphs of temperature and irradiation power as a function of time for synthesizing GO(A and B)-CEM samples.

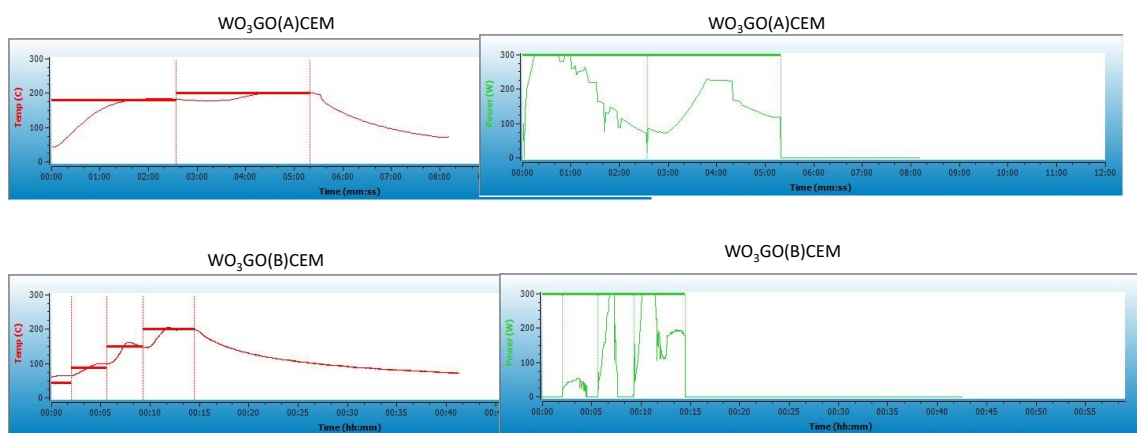

Figure S7. Graphs of temperature and irradiation power as a function of time for synthesizing WO<sub>3</sub>-GO(A and B)-CEM samples.
